# The American Journal of Psychotherapy

APA's journal of psychotherapy practice and research

Since 1947, the *American Journal of Psychotherapy* has provided a forum for advancing the theory, science, and clinical practice of psychotherapy, publishing articles that expand understanding of psychotherapies, especially in the domains of efficacy, process, education, and practice. The journal provides authors and readers the opportunity to engage fully in pressing psychotherapy issues such as defining core elements of psychotherapies, dissemination of evidence-based practices, scaling best practices for expansion to larger populations, understanding mechanisms of change, and evaluating best practices for psychotherapy training and supervision. From its new home as part of APA Publishing's portfolio of journals, the *American Journal of Psychotherapy* is the ideal vehicle to disseminate knowledge about psychotherapy and send a message that psychotherapy remains firmly within the purview of psychiatry.

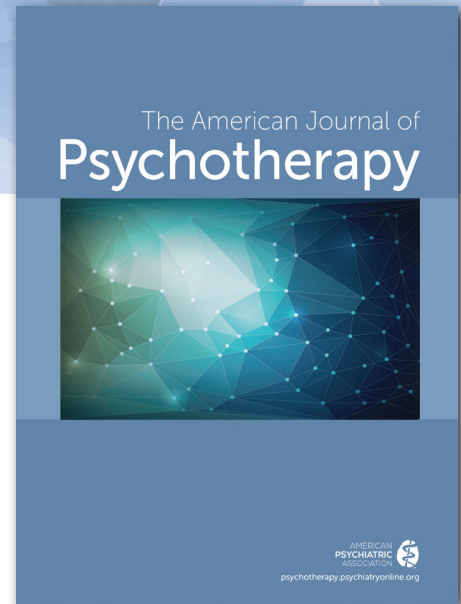

Holly A. Swartz, M.D., Editor-in-Chief

Frequency: Quarterly

Online ISSN: 2575-6559

[psychotherapy.psychiatryonline.org](http://psychotherapy.psychiatryonline.org)

- ▶ To receive updates on new content, follow the journal on Twitter (@APAPubJournals) and sign up for free publication alerts at [psychiatryonline.org](http://psychiatryonline.org)
- ▶ To see more from the journal, including its entire 70+-year archive or to get information about submitting a paper, visit [www.psychotherapy.psychiatryonline.org](http://www.psychotherapy.psychiatryonline.org)

Check out the most discussed and downloaded papers of those recently published:

- Should Psychotherapy Become a Subspecialty of Psychiatry?
- The Role of Psychotherapy During the COVID-19 Pandemic
- Mass Shootings and Psychotherapy
- Racism: A Challenge for the Therapeutic Dyad

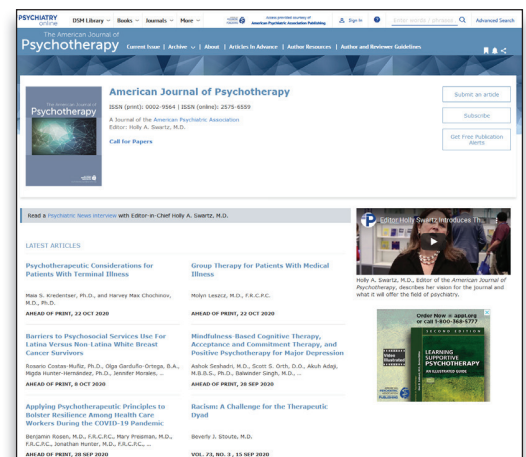

AMERICAN  
PSYCHIATRIC  
ASSOCIATION  
PUBLISHING  [appi.org](http://appi.org)  
1-800-368-5777  
[appi@psych.org](mailto:appi@psych.org)

Subscribe Now! Visit [appi.org](http://appi.org) for pricing and more information!

[psychotherapy.psychiatryonline.org](http://psychotherapy.psychiatryonline.org)

AH2041A
